# Supplementary material for: The active site behaviour of electrochemically synthesised gold nanomaterials
Source: Royal Society of Chemistry journal article supplement (doi:10.1039/c1fd00017a), 2011-01-01
Supplement: c1fd00017a.pdf [file c1fd00017a.pdf]

# **The active site behaviour of electrochemically synthesised gold nanomaterials**

Blake J. Plowman, Anthony P. O'Mullane\* and Suresh K. Bhargava\*

School of Applied Sciences, RMIT University, GPO Box 2476V, VIC 3001, Australia

\*Email: [anthony.omullane@rmit.edu.au](mailto:anthony.omullane@rmit.edu.au) / [suresh.bhargava@rmit.edu.au](mailto:suresh.bhargava@rmit.edu.au)

**Electronic Supplementary Information**

## Supplementary Figures

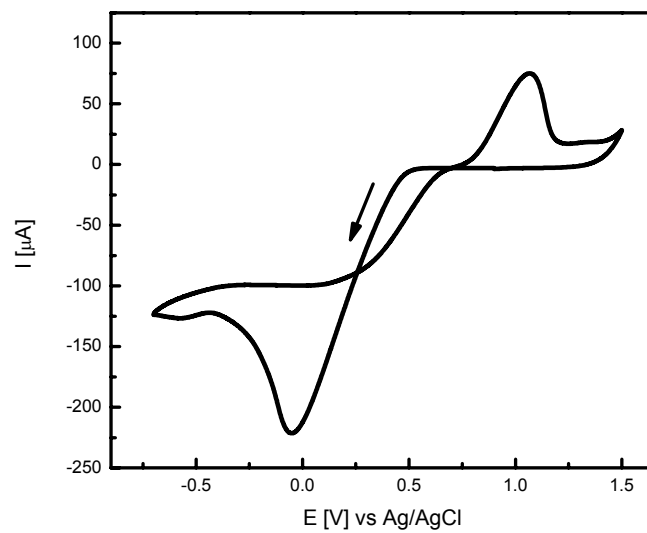

**Figure S1:** Cyclic voltammogram of Indium Tin Oxide substrate in 5 mM  $\text{KAuBr}_4$ , recorded at a sweep rate of  $50 \text{ mV s}^{-1}$ .

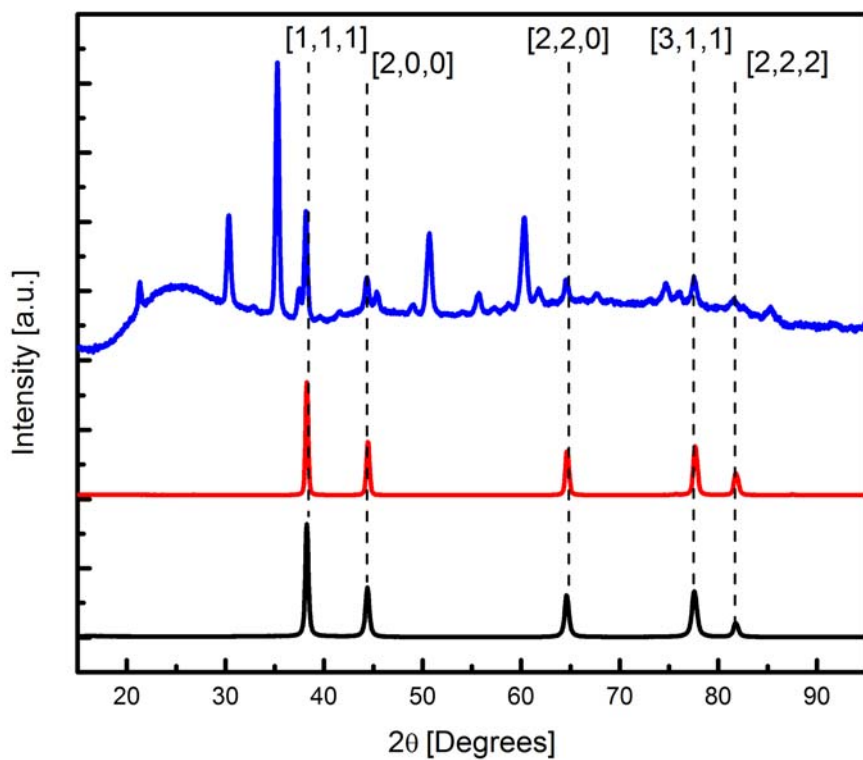

**Figure S2:** XRD patterns of a gold electrode (black), honeycomb gold (red) and anisotropic gold on ITO (blue) samples. The additional peaks for the anisotropic gold structures are due to the underlying ITO electrode.

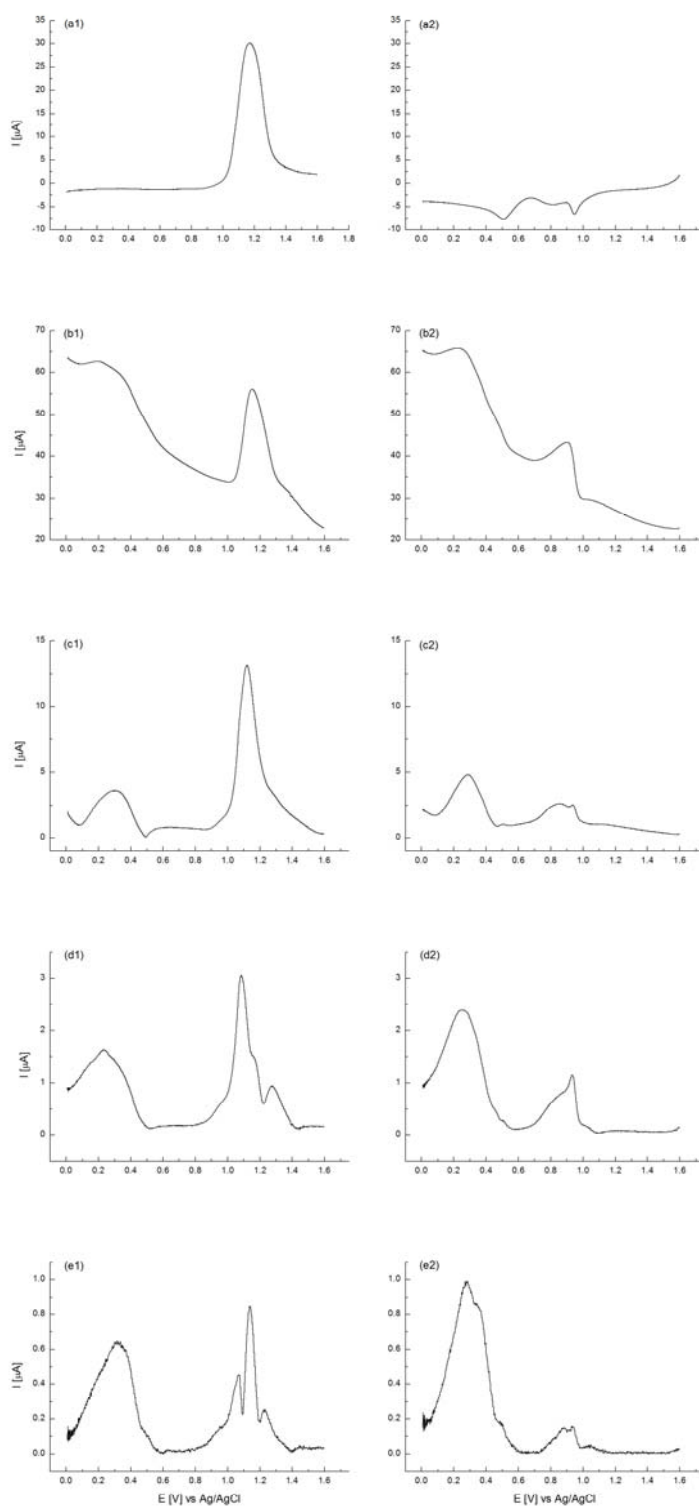

**Figure S3:** FT-ac voltammograms for anisotropic gold structures on ITO in 1 M  $\text{H}_2\text{SO}_4$  obtained at a scan rate of  $59.6 \text{ mV s}^{-1}$ . For clarity the scans are separated into the forward and reverse components (1 and 2, respectively) for the DC scan (a), first harmonic (b), second harmonic (c), third harmonic (d) and fourth harmonic (e) ac responses.

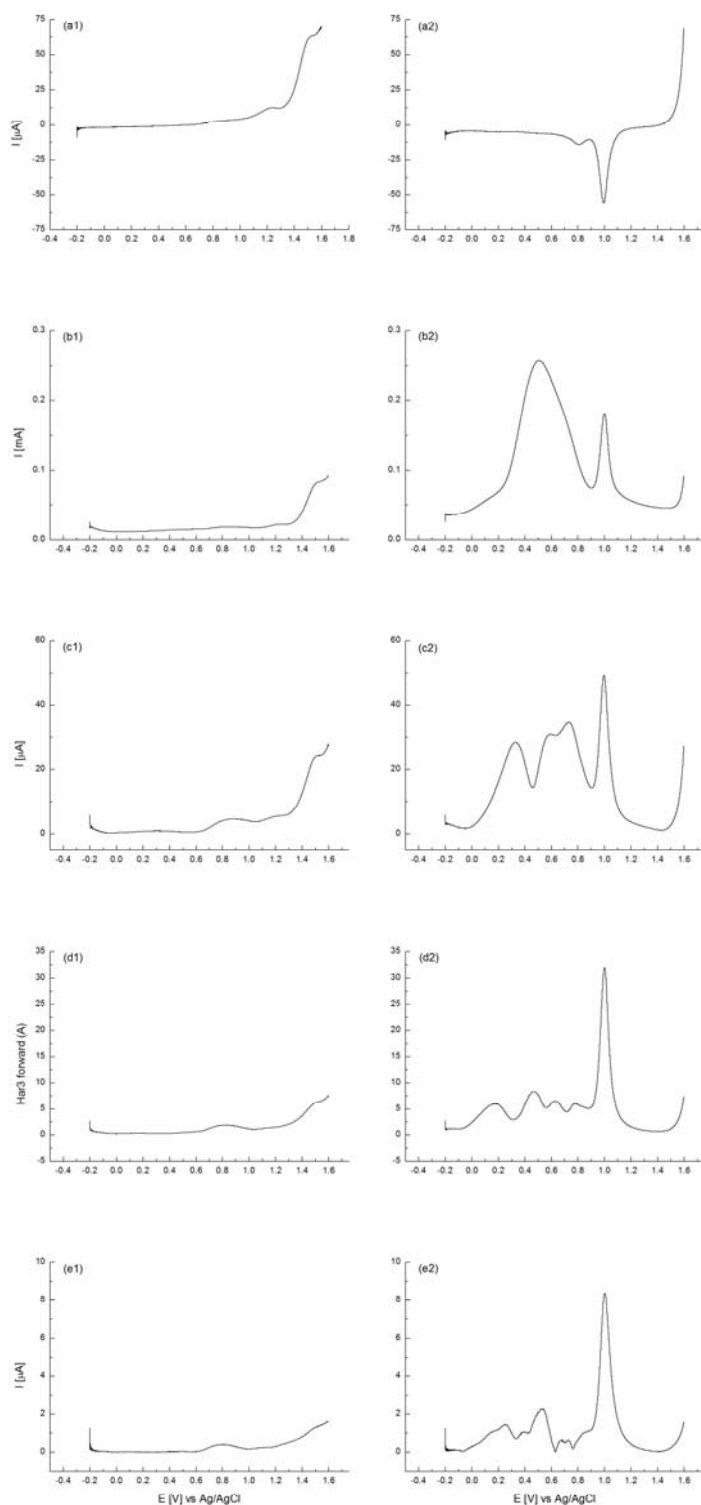

**Figure S4:** FT-ac voltammogram for evaporated gold in 1 M H<sub>2</sub>SO<sub>4</sub> obtained at a scan rate of 67.1 mV s<sup>-1</sup>. For clarity the scans are separated into the forward and reverse components (1 and 2, respectively) for the DC scan (a), first harmonic (b), second harmonic (c), third harmonic (d) and fourth harmonic (e) ac responses.

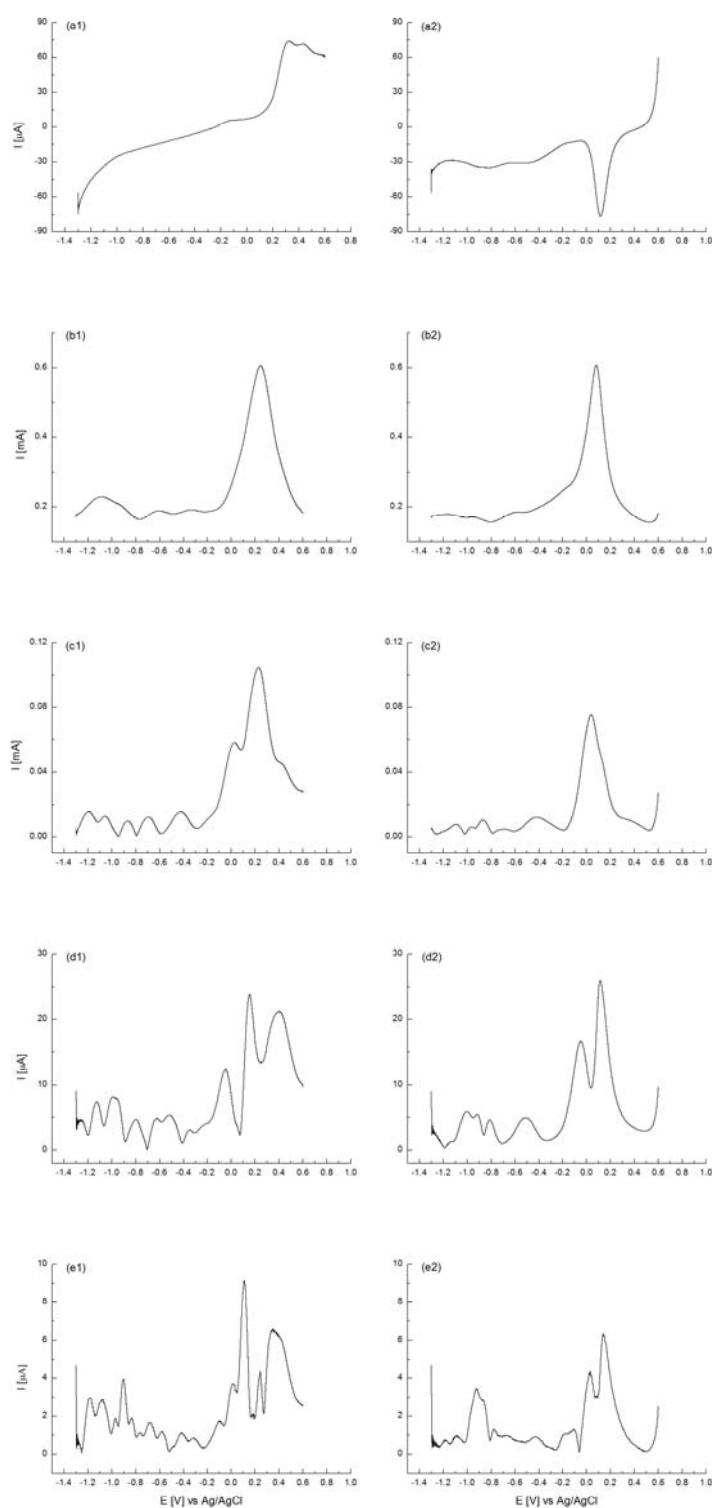

**Figure S5:** FT-ac voltammograms for evaporated gold in 1 M NaOH obtained at a scan rate of  $70.8 \text{ mV s}^{-1}$ . For clarity the scans are separated into the forward and reverse components (1 and 2, respectively) for the DC scan (a), first harmonic (b), second harmonic (c), third harmonic (d) and fourth harmonic (e) ac responses.

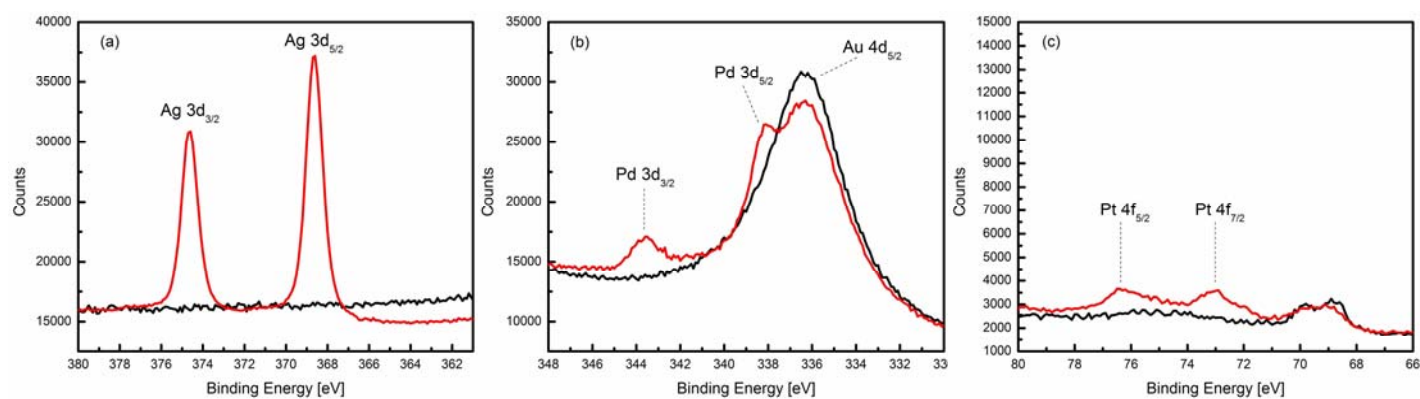

**Figure S6:** XPS spectra of porous gold after decoration with Ag (a), Pd (b) and Pt (c). Note that the data was aligned with the adventitious C 1s binding energy of 285 eV, after which peak assignments were made from the National Institute of Standards and Technology Database (NIST), found at <http://srdata.nist.gov/xps>

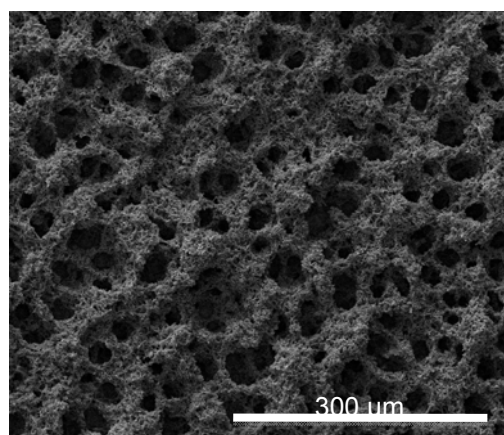

**Figure S7:** SEM image of porous gold after decoration with Ag.

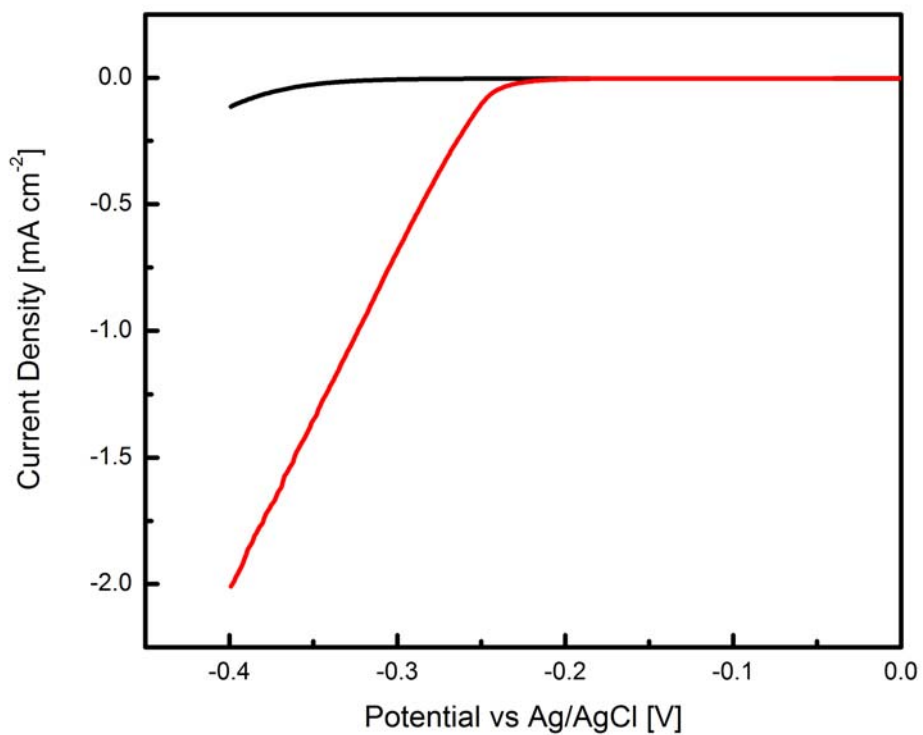

**Figure S8:** Linear sweep voltammogram of porous gold before (black) and after (red) Pt decoration in 1 M H<sub>2</sub>SO<sub>4</sub>, recorded at a sweep rate of 5 mV s<sup>-1</sup>.



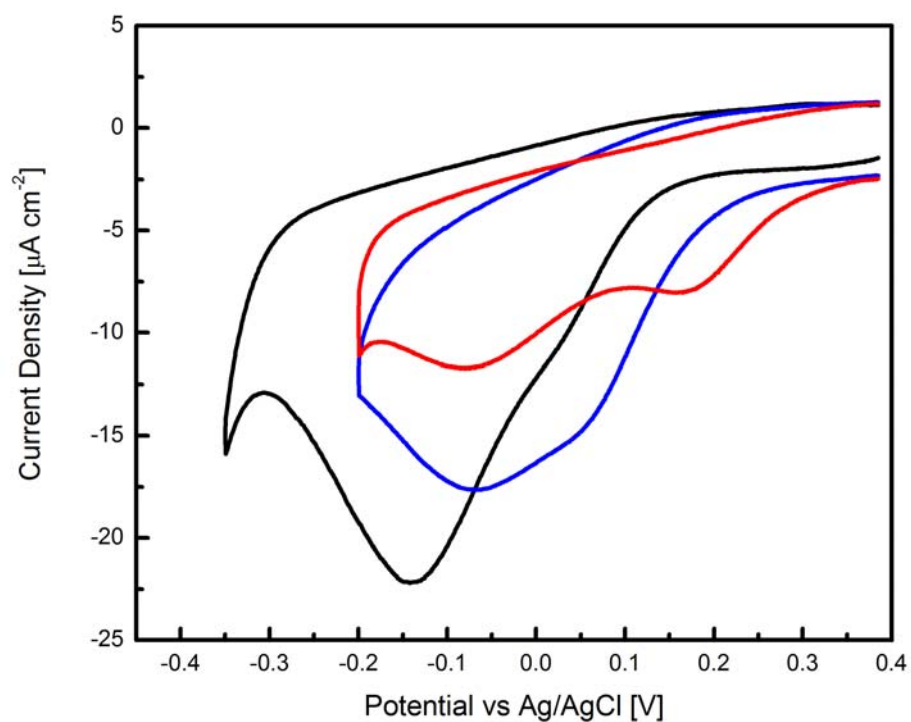

**Figure S9:** Cyclic voltammograms of porous gold before (black) and after Pd (blue) and Pt (red) decoration in oxygen saturated 1 M  $\text{H}_2\text{SO}_4$ , recorded at a sweep rate of  $50 \text{ mV s}^{-1}$ .
